# Supplementary material for: Comparison of iodinated disinfection by-product formation from the reaction of chlorine, monochloramine, and organic chloramine with seaweed salt during a simulated household cooking process
Source: Royal Society of Chemistry journal article supplement (doi:10.1039/d2ew00256f), 2022-01-01
Supplement: d2ew00256f1.pdf [file d2ew00256f1.pdf]

## Supporting Information

*for*

### **Comparison of iodinated disinfection by-product formation from the reaction of chlorine, monochloramine, and organic chloramine with seaweed salt during the simulated household cooking process**

Ruixin Qu<sup>a, b, 1</sup>, Shunke Ding<sup>a, b, 1</sup>, Haixin Li<sup>a, b</sup>, Pin Wang<sup>a, b</sup>, Lixing Pan<sup>a</sup> and Wenhai Chu<sup>a, b, \*</sup>

<sup>a</sup> State Key Laboratory of Pollution Control and Resource Reuse, College of Environmental Science and Engineering, Tongji University, Shanghai, 200092, China

<sup>b</sup> Shanghai Institute of Pollution Control and Ecological Security, Shanghai, 200092, China

\*Corresponding author:

Tel.: +8618721871983; Fax: +86 21 65986839

E-mail address: feedwater@126.com (W. Chu)

Address: Room 407, National Engineering Research Center for Urban Pollution Control, 1239 Siping Road, Yangpu District, Shanghai, 200092, China.

<sup>1</sup> These authors contributed equally to this study.

**Text S1. Analytical methods.**

10 mL aliquots of the sample were quenched with ascorbic acid at the same initial disinfectant molar concentration and extracted with 2 mL of methyl tert-butyl ether (MtBE). Then, the solution was shaken by a multi-tube vortex mixer (DMT-2500, Shanghai, China) at 2300 rpm for 5 min, and the samples were settled down for 5 min. Finally, 1 mL of the organic phase was withdrawn and analyzed by Shimadzu QP2010plus gas chromatography equipped with electron capture detection (GC/ECD, Kyoto, Japan). The column was a Restek RTX-5MS silica capillary one (30 m × 0.25 mm, I.D. with 0.25 μm film thickness, Bellefonte, USA). The injector temperature and detector temperature were 200 °C and 280 °C, respectively. The oven program was holding at 35 °C for 10 min, then ramping to 200 °C at 20 °C/min and holding for 5 min.

**Text S2. The sample pretreatment for toxicity determination**

Sulfuric acid was added into 500 mL of each sample to acidify to pH <0.5 and saturated with sodium sulfate. Then the water sample was extracted with 50 mL MtBE three times. The organic phase was concentrated to approximately 5 mL by rotary evaporator and evaporated all MtBE by nitrogen gas. The remaining solid was stored at -18 °C. The solid was dissolved by Dulbecco's modified Eagles medium (DMEM) (containing 0.5% of dimethyl sulfoxide (DMSO)) to prepare a stock solution before use. And the stock solution was diluted into different concentrations to test cytotoxicity. Mean cell concentration values were calculated as a percentage of the mean negative control value (set at 100% viability).

**Table S1. Characteristics of seaweed salts <sup>1</sup>.**

| <b>Parameters</b>       | <b>Salt-1</b> | <b>Salt-2</b> |
|-------------------------|---------------|---------------|
| I <sup>-</sup> (mg I/g) | 0.025 ± 0.002 | 0.029 ± 0.003 |
| DOC (mg/g)              | 0.072 ± 0.002 | 0.019 ± 0.001 |
| UV <sub>254</sub> *     | 0.060 ± 0.001 | 0.050 ± 0.001 |
| TOI (mg I/g)            | 0.023 ± 0.001 | 0.012 ± 0.001 |

\* The value represents the absorbance at 254 nm of salt solution (10 g/L).

**Table S2. Characteristics of water samples.**

| <b>Parameters</b>                      | <b>Tap water A</b> | <b>Tap water B</b> | <b>Tap water C</b> |
|----------------------------------------|--------------------|--------------------|--------------------|
| DOC (mg/L)                             | 1.51 ± 0.3         | 2.10               | 2.13               |
| Total chlorine (mg/L)                  | ≤0.02              | 1.02               | 0.93               |
| Free chlorine (mg/L)                   | -                  | 0.88               | 0.07               |
| Monochloramine (mg/L)                  | -                  | 0.00               | 0.84               |
| Other reactive chlorine species (mg/L) | -                  | 0.14               | 0.02               |

**Table S3. Characteristics, sources, and limit of quantitation of the DBP.**

| <b>DBPs</b> | <b>CAS No.</b> | <b>Chemical formula</b> | <b>Molecular weight</b> | <b>LC<sub>50</sub> (M) <sup>2</sup></b> | <b>Limit of detection (µg/L)</b> | <b>Limit of quantitation (µg/L)</b> | <b>Source and purity</b> |
|-------------|----------------|-------------------------|-------------------------|-----------------------------------------|----------------------------------|-------------------------------------|--------------------------|
| TCM         | 67-66-3        | CHCl <sub>3</sub>       | 119.38                  | 9.62×10 <sup>-3</sup>                   | 0.19                             | 0.63                                | Supelco, 99%             |
| BDCM        | 75-27-4        | CHBrCl <sub>2</sub>     | 163.83                  | 1.15×10 <sup>-2</sup>                   | 0.12                             | 0.39                                | Supelco, 99%             |
| DBCM        | 124-48-1       | CHBr <sub>2</sub> Cl    | 208.28                  | 5.36×10 <sup>-3</sup>                   | 0.19                             | 0.63                                | Supelco, 99%             |
| TBM         | 75-25-2        | CHBr <sub>3</sub>       | 252.73                  | 4.13×10 <sup>-3</sup>                   | 0.82                             | 2.72                                | Supelco, 99%             |
| DCIM        | 594-04-7       | CHCl <sub>2</sub> I     | 210.83                  | 3.96×10 <sup>-3</sup>                   | 0.19                             | 0.64                                | CanSyn, >95%             |
| CDIM        | 638-73-3       | CHCl <sub>2</sub>       | 302.28                  | 1.91×10 <sup>-3</sup>                   | 0.56                             | 1.87                                | CanSyn, 90-95%           |
| DBIM        | 593-94-2       | CHBr <sub>2</sub> I     | 299.73                  | 2.41×10 <sup>-3</sup>                   | 0.26                             | 0.86                                | CanSyn, 90-95%           |
| BDIM        | 557-95-9       | CHBrI <sub>2</sub>      | 346.73                  | 1.40×10 <sup>-3</sup>                   | 0.21                             | 0.69                                | CanSyn, 90-95%           |
| TIM         | 75-47-8        | CHI <sub>3</sub>        | 393.73                  | 6.60×10 <sup>-5</sup>                   | 0.20                             | 0.67                                | Aladdin, 99%             |

**Table S4. Henry's law constant of disinfectants <sup>3</sup>.**

| <b>Disinfectant</b>                  | <b>Henry's law constant (atm-m<sup>3</sup>/M)</b> |
|--------------------------------------|---------------------------------------------------|
| Organic chloramine (N-Chloroglycine) | $2.56 \times 10^{-7}$                             |
| HOCl                                 | $3.22 \times 10^{-5}$                             |
| NH <sub>2</sub> Cl                   | $3.37 \times 10^{-4}$                             |

**Table S5. One-way ANOVA results.**

| <b>Water Sample</b>            | <b>Variance</b>      | <b>Quadratic sum</b> | <b>Degree of freedom</b> | <b>Mean square</b> | <b>F</b> | <b>Statistical significance*</b> |
|--------------------------------|----------------------|----------------------|--------------------------|--------------------|----------|----------------------------------|
| Heated Tap water B             | Between groups       | 0.50                 | 8                        | 0.06               | 1.197    | <b>0.354</b>                     |
|                                | Within groups        | 0.94                 | 18                       | 0.05               |          |                                  |
|                                | Total statistic data | 1.44                 | 26                       |                    |          |                                  |
| Heated Tap water B with Salt-1 | Between groups       | 0.785                | 8                        | 0.098              | 24.799   | <b>&lt; 0.001 *</b>              |
|                                | Within groups        | 0.071                | 18                       | 0.004              |          |                                  |
|                                | Total statistic data | 0.856                | 26                       |                    |          |                                  |
| Heated Tap water C             | Between groups       | 0.612                | 8                        | 0.077              | 1.226    | <b>0.340</b>                     |
|                                | Within groups        | 1.124                | 18                       | 0.062              |          |                                  |
|                                | Total statistic data | 1.736                | 26                       |                    |          |                                  |
| Heated Tap water C with Salt-1 | Between groups       | 0.182                | 8                        | 0.023              | 1.469    | <b>0.236</b>                     |
|                                | Within groups        | 0.278                | 18                       | 0.015              |          |                                  |
|                                | Total statistic data | 0.460                | 26                       |                    |          |                                  |

\*Statistical significance < 0.05 was regarded as significant variation by concentration factor.



Figure S1. Disinfectant concentration variation at different temperatures in ultrapure water.

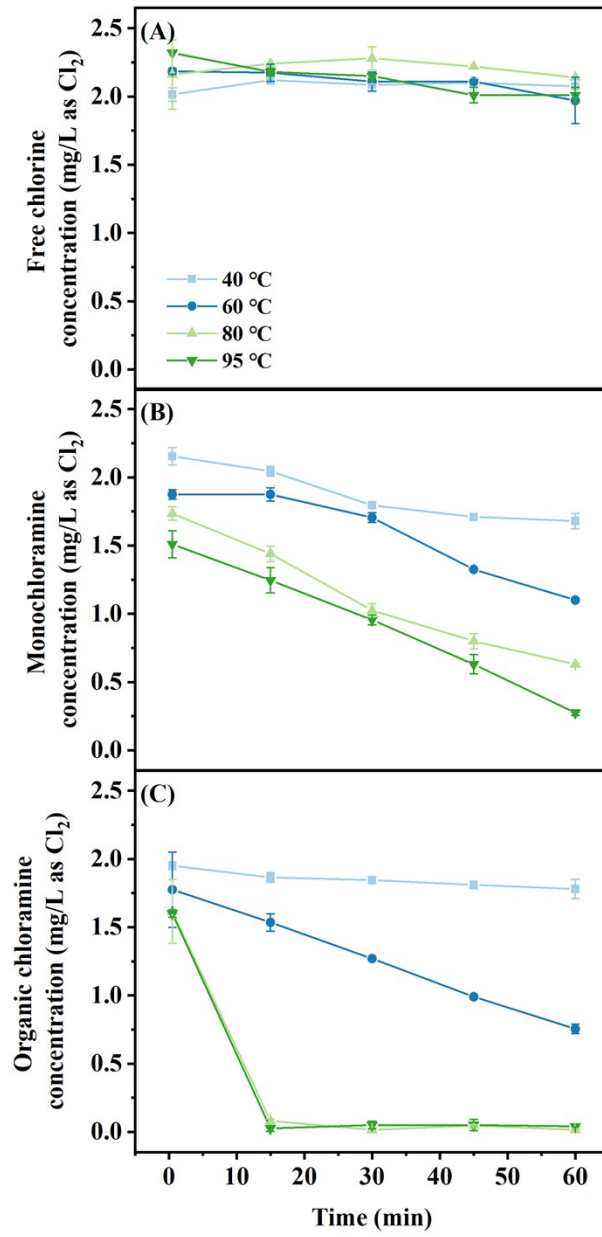

**Figure S2. Fluorescence EEM spectra with chlorination (C and I), chloramination (D and J), performed organic chloramination (E and K) and in situ organic chloramination (F and L) or without disinfectant (B and H) during simulated household cooking with Tap water A (Reaction condition: seaweed iodine table salt dose = 10.0 g/L, disinfectant dose = 2.0 mg/L, temperature = 80 °C, time = 1.0 h, and unbuffered). A and G were UP water and reacted at the same condition. A~F were added Salt-1, while G~L were added Salt-2.**

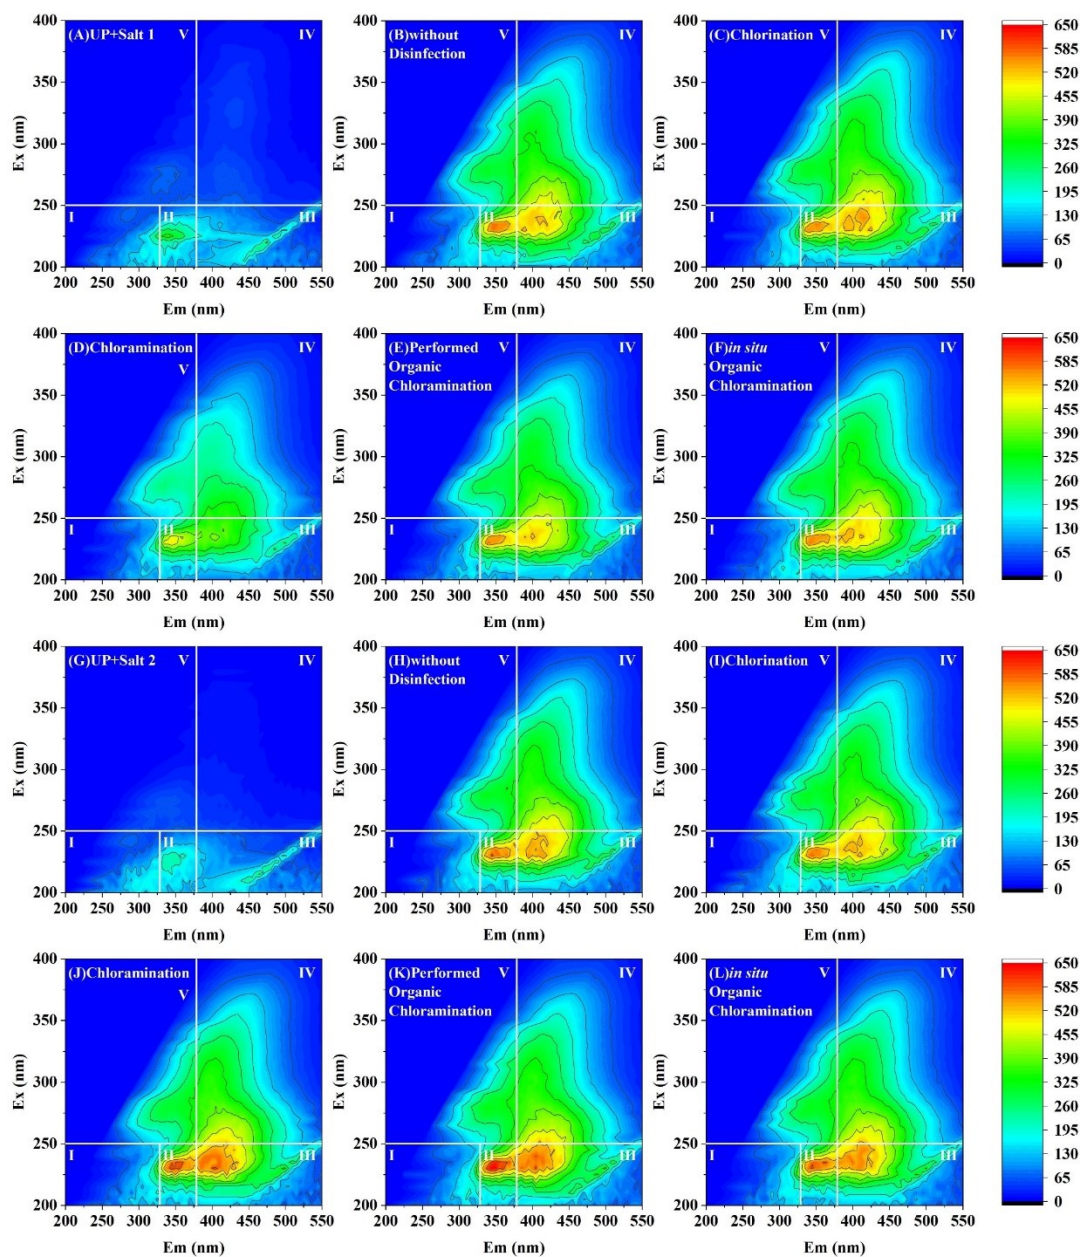

Figure S3. CHO cell chronic cytotoxicity of DBP mixture in Tap water B and Tap water C during simulated household cooking with seaweed iodine table salt. (Salt dose = 10.0 g/L, temperature = 80 °C, reaction time=1 h.)

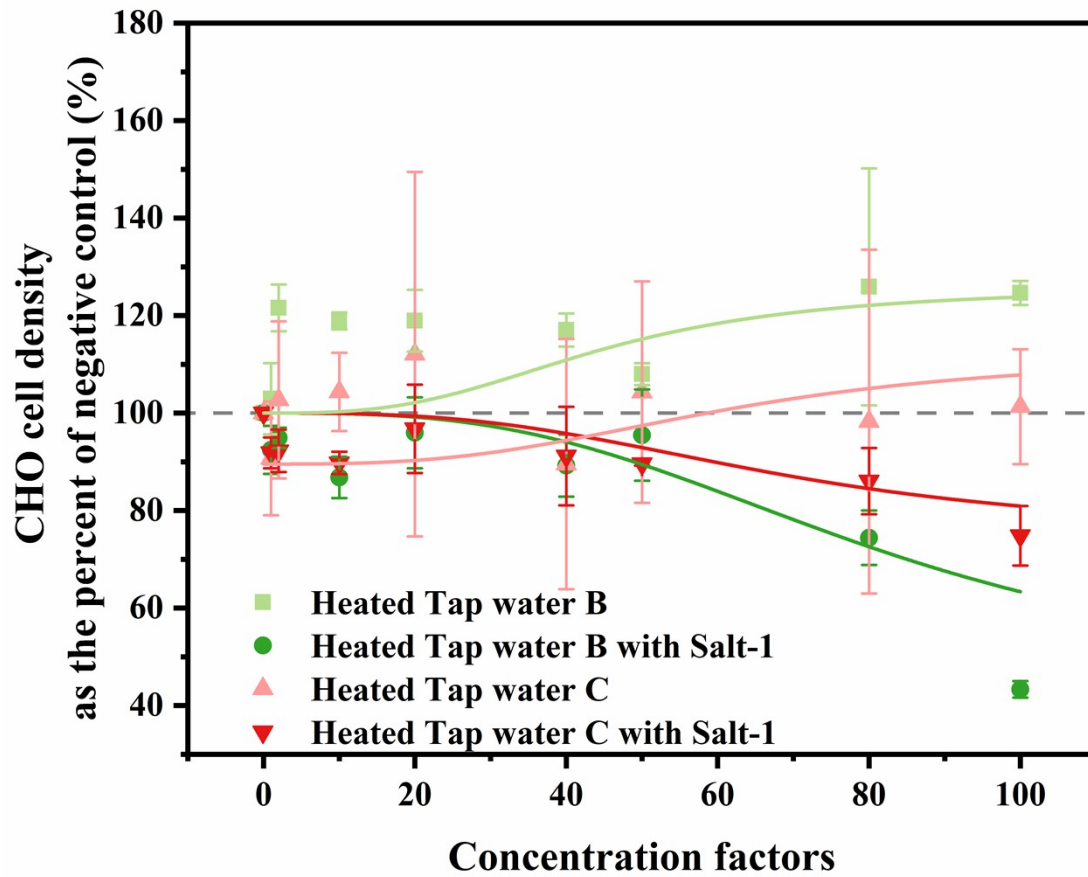

## References

1. Z. Cao, S. Ding, Y. Deng, X. Luan and W. Chu, Household cooking with seaweed salts and chloraminated tap water produce harmful iodinated disinfection by-products, *Chem Eng J*, 2022, **431**, 133471.
2. E. D. Wagner and M. J. Plewa, CHO cell cytotoxicity and genotoxicity analyses of disinfection by-products: An updated review, *J Environ Sci (China)*, 2017, **58**, 64-76.
3. S. J. Judd and S. H. Black, Disinfection by-product formation in swimming pool waters: A simple mass balance, *Water Res*, 2000, **34**, 1611-1619.
